# Supplementary material for: 5-Methylindole kills various bacterial pathogens and potentiates aminoglycoside against methicillin-resistant Staphylococcus aureus
Source: PeerJ. 2022 Sep 14;10:e14010. doi: 10.7717/peerj.14010 (PMC9482361; doi:10.7717/peerj.14010)
Supplement: Supplemental Information 2 [file peerj-10-14010-s002.xlsx]

## Sheet: Sheet1
Figure 1A (S. aureus)		CFU			CFU/mL			log（CFU/mL)			average	stdev		CFU/mL=The number of colony * dilution ratio *250
	Indole
	untrtated	210	220	192	21000000	22000000	19200000	9.72016	9.74036	9.68124	9.71392	0.0300503
	1mM	191	174	155	19100000	17400000	15500000	9.67897	9.63849	9.58827	9.63524	0.0454378
	2mM	183	205	171	18300000	20500000	17100000	9.66039	9.70969	9.63094	9.66701	0.0397935
	3mM	152	142	163	15200000	14200000	16300000	9.57978	9.55023	9.61013	9.58005	0.0299505
	4mM	115	132	107	11500000	13200000	10700000	9.45864	9.51851	9.42732	9.46816	0.0463346
	5mM	103	108	118	10300000	10800000	11800000	9.41078	9.43136	9.46982	9.43732	0.0299698
	6mM	40	48	35	4000000	4800000	3500000	9	9.07918	8.94201	9.00706	0.0688588
	7mM	90	70	96	900000	700000	960000	8.35218	8.24304	8.38021	8.32514	0.0724737
	8mM	86	82	65	860000	820000	650000	8.33244	8.31175	8.21085	8.28502	0.0650534
	2-Methylindole
	untrtated
	1mM	200	258	210	20000000	25800000	21000000	9.69897	9.80956	9.72016	9.7429	0.0586963
	2mM	183	149	175	18300000	14900000	17500000	9.66039	9.57113	9.64098	9.62417	0.0469474
	3mM	118	82	105	11800000	8200000	10500000	9.46982	9.31175	9.41913	9.40024	0.0807102
	4mM	66	90	59	6600000	9000000	5900000	9.21748	9.35218	9.16879	9.24615	0.0949971
	5mM	124	113	96	1240000	1130000	960000	8.49136	8.45102	8.38021	8.44086	0.0562667
	6mM	52	41	62	520	410	620	5.11394	5.01072	5.19033	5.105	0.0901373
	7mM	32	21	38	32	21	38	3.90309	3.72016	3.97772	3.86699	0.132522
	8mM	<1	<1	<1	<250	<250	<250	<2.4	<2.4	<2.4	<2.4
	5-Methylindole
	untrtated	220	179	159	22000000	17900000	15900000	9.74036	9.65079	9.59934	9.6635	0.071366
	1mM	187	171	139	18700000	17100000	13900000	9.66978	9.63094	9.54095	9.61389	0.0660832
	2mM	107	94	124	10700000	9400000	12400000	9.42732	9.37107	9.49136	9.42992	0.0601889
	3mM	90	82	69	9000000	8200000	6900000	9.35218	9.31175	9.23679	9.30024	0.0585517
	4mM	74	68	86	740000	680000	860000	8.26717	8.23045	8.33244	8.27669	0.0516562
	5mM	118	132	80	11800	13200	8000	6.46982	6.51851	6.30103	6.42979	0.114135
	6mM	<1	<1	<1	<250	<250	<250	<2.4	<2.4	<2.4	<2.4	#DIV/0!
	7mM	<1	<1	<1	<250	<250	<250	<2.4	<2.4	<2.4	<2.4	#DIV/0!
	8mM	<1	<1	<1	<250	<250	<250	<2.4	<2.4	<2.4	<2.4	#DIV/0!
Figure 1B (E. faecalis)
	Indole
	untreated	149	132	121	1490000	1320000	1210000	8.57113	8.51851	8.48073	8.52346	0.0454026
	1mM	88	118	130	880000	1180000	1300000	8.34242	8.46982	8.51188	8.44138	0.0882389
	2mM	121	108	82	1210000	1080000	820000	8.48073	8.43136	8.31175	8.40795	0.0868854
	3mM	110	96	44	1100000	960000	440000	8.43933	8.38021	8.04139	8.28698	0.214728
	4mM	61	65	54	610000	650000	540000	8.18327	8.21085	8.13033	8.17482	0.0409196
	5mM	50	55	42	500000	550000	420000	8.09691	8.1383	8.02119	8.08547	0.0593893
	6mM	61	41	36	610000	410000	360000	8.18327	8.01072	7.95424	8.04941	0.119315
	7mM	40	33	46	400000	330000	460000	8	7.91645	8.0607	7.99238	0.0724229
	8mM	50	33	59	500000	330000	590000	8.09691	7.91645	8.16879	8.06072	0.130004
	2-Methylindole
	untreated	100	145	118	1000000	1450000	1180000	8.39794	8.55931	8.46982	8.47569	0.0808439
	1mM	149	121	130	1490000	1210000	1300000	8.57113	8.48073	8.51188	8.52125	0.0459218
	2mM	61	43	55	610000	430000	550000	8.18327	8.03141	8.1383	8.11766	0.0780067
	3mM	53	90	115	530000	900000	1150000	8.12222	8.35218	8.45864	8.31101	0.171948
	4mM	35	25	27	350000	250000	270000	7.94201	7.79588	7.8293	7.85573	0.0765646
	5mM	61	52	42	6100	5200	4200	6.18327	6.11394	6.02119	6.10613	0.081322
	6mM	<1	<1	<1	<250	<250	<250	<2.4	<2.4	<2.4	<2.4	#DIV/0!
	7mM	<1	<1	<1	<250	<250	<250	<2.4	<2.4	<2.4	<2.4	#DIV/0!
	8mM	<1	<1	<1	<250	<250	<250	<2.4	<2.4	<2.4	<2.4	#DIV/0!
	5-Methylindole
	untreated	139	118	98	1390000	1180000	980000	8.54095	8.46982	8.38917	8.46665	0.0759441
	1mM	61	75	55	610000	750000	550000	8.18327	8.273	8.1383	8.19819	0.0685778
	2mM	121	115	84	1210000	1150000	840000	8.48073	8.45864	8.32222	8.42053	0.0858507
	3mM	70	57	82	700000	570000	820000	8.24304	8.15381	8.31175	8.2362	0.0791911
	4mM	139	175	118	139000	175000	118000	7.54095	7.64098	7.46982	7.55058	0.0859834
	5mM	61	68	78	610	680	780	5.18327	5.23045	5.29003	5.23458	0.0535024
	6mM	<1	<1	<1	<250	<250	<250	<2.4	<2.4	<2.4	<2.4	#DIV/0!
	7mM	<1	<1	<1	<250	<250	<250	<2.4	<2.4	<2.4	<2.4	#DIV/0!
	8mM	<1	<1	<1	<250	<250	<250	<2.4	<2.4	<2.4	<2.4	#DIV/0!
Figure 1C (S. epidermidis)
	Indole
	untreated	200	247	264	2000000	2470000	2640000	8.69897	8.79064	8.81954	8.76972	0.0629504
	1mM	24	210	187	240000	2100000	1870000	7.77815	8.72016	8.66978	8.38936	0.529925
	2mM	187	196	136	1870000	1960000	1360000	8.66978	8.6902	8.53148	8.63049	0.0863477
	3mM	179	152	220	1790000	1520000	2200000	8.65079	8.57978	8.74036	8.65698	0.0804681
	4mM	191	156	196	1910000	1560000	1960000	8.67897	8.59106	8.6902	8.65341	0.0542847
	5mM	191	145	215	1910000	1450000	2150000	8.67897	8.55931	8.73038	8.65622	0.0877756
	6mM	110	118	130	1100000	1180000	1300000	8.43933	8.46982	8.51188	8.47368	0.0364288
	7mM	129	149	124	1290000	1490000	1240000	8.50853	8.57113	8.49136	8.52367	0.041983
	8mM	129	156	105	1290000	1560000	1050000	8.50853	8.59106	8.41913	8.50624	0.0859905
	2-Methylindole
	untreated	132	156	113	1320000	1560000	1130000	8.51851	8.59106	8.45102	8.5202	0.0700383
	1mM	110	126	124	1100000	1260000	1240000	8.43933	8.49831	8.49136	8.47633	0.0322327
	2mM	149	115	130	1490000	1150000	1300000	8.57113	8.45864	8.51188	8.51388	0.0562709
	3mM	136	108	124	1360000	1080000	1240000	8.53148	8.43136	8.49136	8.48473	0.0503855
	4mM	129	139	118	1290000	1390000	1180000	8.50853	8.54095	8.46982	8.50644	0.0356126
	5mM	45	37	53	450000	370000	530000	8.05115	7.96614	8.12222	8.0465	0.0781409
	6mM	121	103	135	12100	10300	13500	6.48073	6.41078	6.52827	6.47326	0.0591031
	7mM	90	98	84	9000	9800	8400	6.35218	6.38917	6.32222	6.35452	0.0335347
	8mM	57	43	59	570	430	590	5.15381	5.03141	5.16879	5.11801	0.0753679
	5-Methylindole
	untreated	90	96	110	900000	960000	1100000	8.35218	8.38021	8.43933	8.39058	0.0444899
	1mM	171	149	159	1710000	1490000	1590000	8.63094	8.57113	8.59934	8.60047	0.0299209
	2mM	149	132	126	1490000	1320000	1260000	8.57113	8.51851	8.49831	8.52932	0.0375907
	3mM	142	124	132	1420000	1240000	1320000	8.55023	8.49136	8.51851	8.52003	0.0294628
	4mM	98	118	136	980000	1180000	1360000	8.38917	8.46982	8.53148	8.46349	0.0713675
	5mM	86	92	98	860000	920000	980000	8.33244	8.36173	8.38917	8.36111	0.0283688
	6mM	225	264	187	225000	264000	187000	7.75012	7.81954	7.66978	7.74648	0.0749475
	7mM	149	129	174	1490	1290	1740	5.57113	5.50853	5.63849	5.57272	0.0649943
	8mM	88	78	95	880	780	950	5.34242	5.29003	5.37566	5.33604	0.0431698
Figure 1D (S. pyogenes)
	Indole
	untreated	200	258	171	2000000	2580000	1710000	8.69897	8.80956	8.63094	8.71316	0.0901527
	1mM	159	220	156	1590000	2200000	1560000	8.59934	8.74036	8.59106	8.64359	0.0839112
	2mM	129	167	118	1290000	1670000	1180000	8.50853	8.62066	8.46982	8.533	0.0783387
	3mM	171	187	220	1710000	1870000	2200000	8.63094	8.66978	8.74036	8.68036	0.055475
	4mM	200	179	225	2000000	1790000	2250000	8.69897	8.65079	8.75012	8.69996	0.0496722
	5mM	121	100	129	1210000	1000000	1290000	8.48073	8.39794	8.50853	8.4624	0.0575276
	6mM	171	193	138	1710000	1930000	1380000	8.63094	8.6835	8.53782	8.61742	0.073774
	7mM	179	149	167	1790000	1490000	1670000	8.65079	8.57113	8.62066	8.61419	0.0402249
	8mM	121	126	152	1210000	1260000	1520000	8.48073	8.49831	8.57978	8.51961	0.0528514
	2-Methylindole
	untreated	129	179	124	1290000	1790000	1240000	8.50853	8.65079	8.49136	8.55023	0.0875138
	1mM	149	108	167	1490000	1080000	1670000	8.57113	8.43136	8.62066	8.54105	0.0981653
	2mM	220	179	136	2200000	1790000	1360000	8.74036	8.65079	8.53148	8.64088	0.104794
	3mM	129	200	175	1290000	2000000	1750000	8.50853	8.69897	8.64098	8.61616	0.0976159
	4mM	191	196	156	1910000	1960000	1560000	8.67897	8.6902	8.59106	8.65341	0.0542847
	5mM	220	171	230	2200000	1710000	2300000	8.74036	8.63094	8.75967	8.71032	0.0694247
	6mM	110	167	136	1100000	1670000	1360000	8.43933	8.62066	8.53148	8.53049	0.0906659
	7mM	129	175	163	1290000	1750000	1630000	8.50853	8.64098	8.61013	8.58655	0.0693018
	8mM	230	167	136	2300000	1670000	1360000	8.75967	8.62066	8.53148	8.63727	0.114998
	5-Methylindole
	untreated	200	167	225	2000000	1670000	2250000	8.69897	8.62066	8.75012	8.68992	0.0652061
	1mM	191	156	163	1910000	1560000	1630000	8.67897	8.59106	8.61013	8.62672	0.0462441
	2mM	171	220	167	1710000	2200000	1670000	8.63094	8.74036	8.62066	8.66399	0.0663443
	3mM	200	171	241	2000000	1710000	2410000	8.69897	8.63094	8.77996	8.70329	0.0746042
	4mM	121	179	247	1210000	1790000	2470000	8.48073	8.65079	8.79064	8.64072	0.155201
	5mM	220	163	136	2200000	1630000	1360000	8.74036	8.61013	8.53148	8.62732	0.105498
	6mM	139	167	121	1390000	1670000	1210000	8.54095	8.62066	8.48073	8.54745	0.070191
	7mM	50	57	47	500	570	470	5.09691	5.15381	5.07004	5.10692	0.0427763
	8mM	2	1	1	2	1	1	2.69897	2.39794	2.39794	2.49828	0.1738
Figure 1E (S.iniae)
	Indole
	0	55	52	59	5500000	5200000	5900000	9.1383	9.11394	9.16879	9.14035	0.0274814	0	9.14035	0.0274814	0	9.15345	0.0617404	0	9.12477	0.0608735
	1mM	80	86	94	800000	860000	940000	8.30103	8.33244	8.37107	8.33485	0.0350809	1	8.33485	0.0350809	1	8.10236	0.0638746	0.5	8.18401	0.0460775
	2mM	35	38	19	350000	380000	190000	7.94201	7.97772	7.67669	7.86548	0.164462	2	7.86548	0.164462	1.5	7.22772	0.0601733	1	7.60594	0.0811626
	3mM	45	34	53	45000	34000	53000	7.05115	6.92942	7.12222	7.03426	0.0975019	3	7.03426	0.0975019	2	6.12845	0.0491979	1.5	5.94118	0.0804289
	4mM	105	91	98	1050	910	980	5.41913	5.35698	5.38917	5.38843	0.0310806	4	5.38843	0.0310806	2.5	5.64932	0.121872	2	#VALUE!	#VALUE!
	4.5mM	<1	<1	<1	<250	<250	<250	<2.4	<2.4	<2.4	<2.4	#DIV/0!	4.5	#VALUE!	#VALUE!	3	#VALUE!	#VALUE!	2.5	#VALUE!	#VALUE!
	5mM	<1	<1	<1	<250	<250	<250	<2.4	<2.4	<2.4	<2.4	#DIV/0!	5	#VALUE!	#VALUE!	3.5mM	#VALUE!	#VALUE!
	2-Methylindole
	untreated	58	49	65	5800000	4900000	6500000	9.16137	9.08814	9.21085	9.15345	0.0617404
	1mM	50	44	59	500000	440000	590000	8.09691	8.04139	8.16879	8.10236	0.0638746
	1.5mM	70	58	76	70000	58000	76000	7.24304	7.16137	7.27875	7.22772	0.0601733
	2mM	61	52	49	6100	5200	4900	6.18327	6.11394	6.08814	6.12845	0.0491979
	2.5mM	230	187	132	2300	1870	1320	5.75967	5.66978	5.51851	5.64932	0.121872
	3mM	<1	<1	<1	<250	<250	<250	<2.4	<2.4	<2.4	<2.4	#DIV/0!
	3.5mM	<1	<1	<1	<250	<250	<250	<2.4	<2.4	<2.4	<2.4	#DIV/0!
	5-Methylindole
	untreated	62	52	47	6200000	5200000	4700000	9.19033	9.11394	9.07004	9.12477	0.0608735
	0.5mM	61	68	55	610000	680000	550000	8.18327	8.23045	8.1383	8.18401	0.0460775
	1mM	159	196	135	159000	196000	135000	7.59934	7.6902	7.52827	7.60594	0.0811626
	1.5mM	35	42	29	3500	4200	2900	5.94201	6.02119	5.86034	5.94118	0.0804289
	2mM	<1	<1	<1	<250	<250	<250	<2.4	<2.4	<2.4	<2.4	#DIV/0!
	2.5mM	<1	<1	<1	<250	<250	<250	<2.4	<2.4	<2.4	<2.4	#DIV/0!
Figure 1F (M. luteus)
	Indole
	untreated	252	290	310	2520000	2900000	3100000	8.79934	8.86034	8.8893	8.84966	0.0459213
	1mM	258	264	277	2580000	2640000	2770000	8.80956	8.81954	8.84042	8.82317	0.0157471
	2mM	270	283	310	2700000	2830000	3100000	8.8293	8.84973	8.8893	8.85611	0.0305042
	3mM	231	210	215	2310000	2100000	2150000	8.76155	8.72016	8.73038	8.73736	0.0215622
	4mM	149	136	175	1490000	1360000	1750000	8.57113	8.53148	8.64098	8.58119	0.0554395
	5mM	210	175	200	2100000	1750000	2000000	8.72016	8.64098	8.69897	8.6867	0.0409913
	6mM	167	132	149	1670000	1320000	1490000	8.62066	8.51851	8.57113	8.5701	0.051079
	7mM	159	145	187	1590000	1450000	1870000	8.59934	8.55931	8.66978	8.60948	0.0559303
	8mM	145	149	126	1450000	1490000	1260000	8.55931	8.57113	8.49831	8.54291	0.0390779
	2-Methylindole
	untreated	310	283	247	3100000	2830000	2470000	8.8893	8.84973	8.79064	8.84322	0.049653
	1mM	171	241	283	1710000	2410000	2830000	8.63094	8.77996	8.84973	8.75354	0.111762
	2mM	210	163	247	2100000	1630000	2470000	8.72016	8.61013	8.79064	8.70697	0.0909741
	3mM	230	258	210	2300000	2580000	2100000	8.75967	8.80956	8.72016	8.76313	0.0448006
	4mM	252	205	179	2520000	2050000	1790000	8.79934	8.70969	8.65079	8.71994	0.0748022
	5mM	179	215	196	1790000	2150000	1960000	8.65079	8.73038	8.6902	8.69046	0.0397934
	6mM	175	191	220	1750000	1910000	2200000	8.64098	8.67897	8.74036	8.68677	0.0501491
	7mM	183	171	132	1830000	1710000	1320000	8.66039	8.63094	8.51851	8.60328	0.0748726
	8mM	129	124	149	1290000	1240000	1490000	8.50853	8.49136	8.57113	8.52367	0.041983
	5-Methylindole
	untreated	253	264	247	2530000	2640000	2470000	8.80106	8.81954	8.79064	8.80375	0.0146396
	1mM	241	205	210	2410000	2050000	2100000	8.77996	8.70969	8.72016	8.7366	0.0379082
	2mM	247	264	205	2470000	2640000	2050000	8.79064	8.81954	8.70969	8.77329	0.0569421
	3mM	270	215	247	2700000	2150000	2470000	8.8293	8.73038	8.79064	8.78344	0.0498538
	4mM	220	191	179	2200000	1910000	1790000	8.74036	8.67897	8.65079	8.69004	0.0457994
	5mM	210	297	247	2100000	2970000	2470000	8.72016	8.8707	8.79064	8.79383	0.0753194
	6mM	196	149	215	1960000	1490000	2150000	8.6902	8.57113	8.73038	8.6639	0.0828186
	7mM	179	142	163	1790000	1420000	1630000	8.65079	8.55023	8.61013	8.60372	0.050588
	8mM	<1	<1	<1	<250	<250	<250	<2.4	<2.4	<2.4	<2.4	#DIV/0!
Figure 2A (E.coli)
	Indole
	untreated	90	96	105	9000000	9600000	10500000	9.35218	9.38021	9.41913	9.38384	0.0336207
	1mM	82	92	75	8200000	9200000	7500000	9.31175	9.36173	9.273	9.31549	0.0444814
	2mM	88	98	70	8800000	9800000	7000000	9.34242	9.38917	9.24304	9.32488	0.0746276
	3mM	84	65	80	8400000	6500000	8000000	9.32222	9.21085	9.30103	9.27803	0.0591371
	4mM	80	68	62	8000000	6800000	6200000	9.30103	9.23045	9.19033	9.2406	0.0560434
	5mM	33	24	32	3300000	2400000	3200000	8.91645	8.77815	8.90309	8.8659	0.0762845
	6mM	43	53	32	430000	530000	320000	8.03141	8.12222	7.90309	8.0189	0.110097
	7mM	58	70	45	58	70	45	4.16137	4.24304	4.05115	4.15185	0.096296
	8mM	<1	<1	<1	<250	<250	<250	<2.4	<2.4	<2.4	<2.4	#DIV/0!
	2-Methylindole
	untreated	92	84	80	9200000	8400000	8000000	9.36173	9.32222	9.30103	9.32833	0.0308062
	1mM	96	88	84	9600000	8800000	8400000	9.38021	9.34242	9.32222	9.34828	0.029437
	2mM	84	86	90	8400000	8600000	9000000	9.32222	9.33244	9.35218	9.33561	0.0152318
	3mM	28	25	31	2800000	2500000	3100000	8.8451	8.79588	8.8893	8.84343	0.0467333
	4mM	<1	<1	<1	<250	<250	<250	<2.4	<2.4	<2.4	<2.4	#DIV/0!
	5mM	<1	<1	<1	<250	<250	<250	<2.4	<2.4	<2.4	<2.4	#DIV/0!
	6mM	<1	<1	<1	<250	<250	<250	<2.4	<2.4	<2.4	<2.4	#DIV/0!
	7mM	<1	<1	<1	<250	<250	<250	<2.4	<2.4	<2.4	<2.4	#DIV/0!
	8mM	<1	<1	<1	<250	<250	<250	<2.4	<2.4	<2.4	<2.4	#DIV/0!
		<1	<1	<1	<250	<250	<250	<2.4	<2.4	<2.4	<2.4
	5-Methylindole
	untreated	90	80	94	9000000	8000000	9400000	9.35218	9.30103	9.37107	9.34143	0.0362366
	1mM	74	65	71	7400000	6500000	7100000	9.26717	9.21085	9.2492	9.24241	0.0287667
	2mM	303	220	205	3030000	2200000	2050000	8.87938	8.74036	8.70969	8.77648	0.0904262
	3mM	<1	<1	<1	<250	<250	<250	<2.4	<2.4	<2.4	<2.4	#DIV/0!
	4mM	<1	<1	<1	<250	<250	<250	<2.4	<2.4	<2.4	<2.4	#DIV/0!
	5mM	<1	<1	<1	<250	<250	<250	<2.4	<2.4	<2.4	<2.4	#DIV/0!
	6mM	<1	<1	<1	<250	<250	<250	<2.4	<2.4	<2.4	<2.4	#DIV/0!
	7mM	<1	<1	<1	<250	<250	<250	<2.4	<2.4	<2.4	<2.4	#DIV/0!
	8mM	<1	<1	<1	<250	<250	<250	<2.4	<2.4	<2.4	<2.4	#DIV/0!
Figure 2B (P. aeruginosa)
	Indole
	untreated	113	103	124	11300000	10300000	12400000	9.45102	9.41078	9.49136	9.45105	0.0402922
	1mM	121	110	126	12100000	11000000	12600000	9.48073	9.43933	9.49831	9.47279	0.0302792
	2mM	108	100	124	10800000	10000000	12400000	9.43136	9.39794	9.49136	9.44022	0.0473366
	3mM	110	98	105	11000000	9800000	10500000	9.43933	9.38917	9.41913	9.41588	0.025241
	4mM	98	94	105	9800000	9400000	10500000	9.38917	9.37107	9.41913	9.39312	0.0242736
	5mM	103	84	113	10300000	8400000	11300000	9.41078	9.32222	9.45102	9.39467	0.0658927
	6mM	45	52	37	4500000	5200000	3700000	9.05115	9.11394	8.96614	9.04375	0.0741787
	7mM	50	38	59	50000	38000	59000	7.09691	6.97772	7.16879	7.08114	0.0965052
	8mM	70	52	78	70	52	78	4.24304	4.11394	4.29003	4.21567	0.0911795
	2-Methylindole
	untreated	118	105	113	11800000	10500000	11300000	9.46982	9.41913	9.45102	9.44666	0.0256263
	1mM	105	118	110	10500000	11800000	11000000	9.41913	9.46982	9.43933	9.44276	0.0255197
	2mM	110	98	92	11000000	9800000	9200000	9.43933	9.38917	9.36173	9.39674	0.0393532
	3mM	110	103	94	11000000	10300000	9400000	9.43933	9.41078	9.37107	9.40706	0.034284
	4mM	121	96	108	121000	96000	108000	7.48073	7.38021	7.43136	7.43077	0.0502597
	5mM	<1	<1	<1	<250	<250	<250	<2.4	<2.4	<2.4	<2.4	#DIV/0!
	6mM	<1	<1	<1	<250	<250	<250	<2.4	<2.4	<2.4	<2.4	#DIV/0!
	7mM	<1	<1	<1	<250	<250	<250	<2.4	<2.4	<2.4	<2.4	#DIV/0!
	8mM	<1	<1	<1	<250	<250	<250	<2.4	<2.4	<2.4	<2.4	#DIV/0!
	5-Methylindole
	untreated	113	118	98	11300000	11800000	9800000	9.45102	9.46982	9.38917	9.43667	0.0421993
	1mM	108	118	90	10800000	11800000	9000000	9.43136	9.46982	9.35218	9.41779	0.059983
	2mM	88	96	79	8800000	9600000	7900000	9.34242	9.38021	9.29557	9.3394	0.0424029
	3mM	270	241	205	270	241	205	4.8293	4.77996	4.70969	4.77298	0.060109
	4mM	<1	<1	<1	<250	<250	<250	<2.4	<2.4	<2.4	<2.4	#DIV/0!
	5mM	<1	<1	<1	<250	<250	<250	<2.4	<2.4	<2.4	<2.4	#DIV/0!
	6mM	<1	<1	<1	<250	<250	<250	<2.4	<2.4	<2.4	<2.4	#DIV/0!
	7mM	<1	<1	<1	<250	<250	<250	<2.4	<2.4	<2.4	<2.4	#DIV/0!
	8mM	<1	<1	<1	<250	<250	<250	<2.4	<2.4	<2.4	<2.4	#DIV/0!
Figure 2C (S. flexneri)
	Indole
	untreated	290	96	110	2900000	9600000	11000000	8.86034	9.38021	9.43933	9.22663	0.31859
	1mM	65	57	68	6500000	5700000	6800000	9.21085	9.15381	9.23045	9.19837	0.0398124
	2mM	52	45	57	5200000	4500000	5700000	9.11394	9.05115	9.15381	9.1063	0.0517558
	3mM	43	36	49	4300000	3600000	4900000	9.03141	8.95424	9.08814	9.0246	0.0672063
	4mM	33	22	39	3300000	2200000	3900000	8.91645	8.74036	8.989	8.88194	0.127864
	5mM	25	171	318	2500000	1710000	3180000	8.79588	8.63094	8.90037	8.77573	0.135841
	6mM	179	159	230	1790000	1590000	2300000	8.65079	8.59934	8.75967	8.66993	0.081861
	7mM	149	130	210	1490000	1300000	2100000	8.57113	8.51188	8.72016	8.60106	0.107315
	8mM	139	171	200	1390000	1710000	2000000	8.54095	8.63094	8.69897	8.62362	0.0792612
	2-Methylindole
	untreated	96	103	92	9600000	10300000	9200000	9.38021	9.41078	9.36173	9.38424	0.0247715
	1mM	33	43	48	3300000	4300000	4800000	8.91645	9.03141	9.07918	9.00901	0.083643
	2mM	40	52	45	4000000	5200000	4500000	9	9.11394	9.05115	9.05503	0.0570707
	3mM	110	191	200	1100000	1910000	2000000	8.43933	8.67897	8.69897	8.60576	0.144476
	4mM	179	149	210	179000	149000	210000	7.65079	7.57113	7.72016	7.64736	0.0745758
	5mM	118	129	98	118	129	98	4.46982	4.50853	4.38917	4.45584	0.0608979
	6mM	<1	<1	<1	<250	<250	<250	<2.4	<2.4	<2.4	<2.4	#DIV/0!
	7mM	<1	<1	<1	<250	<250	<250	<2.4	<2.4	<2.4	<2.4	#DIV/0!
	8mM	<1	<1	<1	<250	<250	<250	<2.4	<2.4	<2.4	<2.4	#DIV/0!
	5-Methylindole
	untreated	86	94	96	8600000	9400000	9600000	9.33244	9.37107	9.38021	9.36124	0.0253577
	1mM	139	92	98	13900000	9200000	9800000	9.54095	9.36173	9.38917	9.43062	0.0965358
	2mM	92	86	80	9200000	8600000	8000000	9.36173	9.33244	9.30103	9.33173	0.0303551
	3mM	139	121	191	1390000	1210000	1910000	8.54095	8.48073	8.67897	8.56688	0.101636
	4mM	35	43	30	350	430	300	4.94201	5.03141	4.87506	4.94949	0.0784419
	5mM	<1	<1	<1	<250	<250	<250	<2.4	<2.4	<2.4	<2.4	#DIV/0!
	6mM	<1	<1	<1	<250	<250	<250	<2.4	<2.4	<2.4	<2.4	#DIV/0!
	7mM	<1	<1	<1	<250	<250	<250	<2.4	<2.4	<2.4	<2.4	#DIV/0!
	8mM	<1	<1	<1	<250	<250	<250	<2.4	<2.4	<2.4	<2.4	#DIV/0!
Figure 3A (MRSA)	MRSA
	Indole
	untreated	75	84	65	7500000	8400000	6500000	9.273	9.32222	9.21085	9.26869	0.0558079
	1mM	70	71	82	7000000	7100000	8200000	9.24304	9.2492	9.31175	9.268	0.0380197
	2mM	75	68	78	7500000	6800000	7800000	9.273	9.23045	9.29003	9.26449	0.0306901
	3mM	73	82	66	7300000	8200000	6600000	9.26126	9.31175	9.21748	9.2635	0.0471748
	4mM	73	70	76	7300000	7000000	7600000	9.26126	9.24304	9.27875	9.26102	0.017859
	5mM	75	66	75	7500000	6600000	7500000	9.273	9.21748	9.273	9.2545	0.0320529
	6mM	78	71	55	7800000	7100000	5500000	9.29003	9.2492	9.1383	9.22585	0.0785154
	7mM	61	57	44	6100000	5700000	4400000	9.18327	9.15381	9.04139	9.12616	0.0748726
	8mM	58	43	65	5800000	4300000	6500000	9.16137	9.03141	9.21085	9.13454	0.0926811
	2-Methylindole
	untreated	80	90	73	8000000	9000000	7300000	9.30103	9.35218	9.26126	9.30483	0.0455785
	1mM	75	73	70	7500000	7300000	7000000	9.273	9.26126	9.24304	9.2591	0.0150982
	2mM	70	82	61	7000000	8200000	6100000	9.24304	9.31175	9.18327	9.24602	0.0642939
	3mM	65	59	74	6500000	5900000	7400000	9.21085	9.16879	9.26717	9.21561	0.0493617
	4mM	63	43	55	6300000	4300000	5500000	9.19728	9.03141	9.1383	9.12233	0.0840816
	5mM	54	50	42	5400000	5000000	4200000	9.13033	9.09691	9.02119	9.08281	0.0559215
	6mM	25	14	19	2500000	1400000	1900000	8.79588	8.54407	8.67669	8.67221	0.125966
	7mM	50	54	70	500000	540000	700000	8.09691	8.13033	8.24304	8.15676	0.0765646
	8mM	100	68	92	1000	680	920	5.39794	5.23045	5.36173	5.33004	0.0881275
	5-Methylindole
	untreated	75	92	78	7500000	9200000	7800000	9.273	9.36173	9.29003	9.30825	0.0470858
	1mM	73	86	70	7300000	8600000	7000000	9.26126	9.33244	9.24304	9.27891	0.0472415
	2mM	66	63	61	6600000	6300000	6100000	9.21748	9.19728	9.18327	9.19934	0.0172002
	3mM	45	37	57	4500000	3700000	5700000	9.05115	8.96614	9.15381	9.05704	0.0939748
	4mM	37	44	26	3700000	4400000	2600000	8.96614	9.04139	8.81291	8.94015	0.116436
	5mM	30	17	148	3000000	1700000	1480000	8.87506	8.62839	8.5682	8.69055	0.1626
	6mM	60	42	65	600000	420000	650000	8.17609	8.02119	8.21085	8.13604	0.100975
	7mM	100	121	75	1000	1210	750	5.39794	5.48073	5.273	5.38389	0.104572
	8mM	<1	<1	<1	<250	<250	<250	<2.4	<2.4	<2.4	<2.4	#DIV/0!
Figure 3B (K. pneumoniae)
	Indole
	untreated	78	88	75	7800000	8800000	7500000	9.29003	9.34242	9.273	9.30182	0.0361801
	1mM	75	84	71	7500000	8400000	7100000	9.273	9.32222	9.2492	9.28147	0.0372403
	2mM	73	78	82	7300000	7800000	8200000	9.26126	9.29003	9.31175	9.28768	0.0253275
	3mM	70	62	75	7000000	6200000	7500000	9.24304	9.19033	9.273	9.23546	0.0418529
	4mM	57	47	61	5700000	4700000	6100000	9.15381	9.07004	9.18327	9.13571	0.0587476
	5mM	48	55	49	480000	550000	490000	8.07918	8.1383	8.08814	8.10187	0.0318649
	6mM	90	105	82	90000	105000	82000	7.35218	7.41913	7.31175	7.36102	0.0542307
	7mM	54	62	55	5400	6200	5500	6.13033	6.19033	6.1383	6.15299	0.0325839
	8mM	25	21	26	2500	2100	2600	5.79588	5.72016	5.81291	5.77632	0.0493745
	2-Methylindole
	untreated	82	75	88	8200000	7500000	8800000	9.31175	9.273	9.34242	9.30906	0.0347891
	1mM	80	65	73	8000000	6500000	7300000	9.30103	9.21085	9.26126	9.25772	0.0451929
	2mM	75	70	82	7500000	7000000	8200000	9.273	9.24304	9.31175	9.27593	0.0344515
	3mM	80	61	84	80000	61000	84000	7.30103	7.18327	7.32222	7.26884	0.0748592
	4mM	37	27	31	3700	2700	3100	5.96614	5.8293	5.8893	5.89492	0.0685915
	5mM	61	45	52	61	45	52	4.18327	4.05115	4.11394	4.11612	0.0660856
	6mM	<1	<1	<1	<250	<250	<250	<2.4	<2.4	<2.4	<2.4	#DIV/0!
	7mM	<1	<1	<1	<250	<250	<250	<2.4	<2.4	<2.4	<2.4	#DIV/0!
	8mM	<1	<1	<1	<250	<250	<250	<2.4	<2.4	<2.4	<2.4	#DIV/0!
	5-Methylindole
	untreated	86	76	88	8600000	7600000	8800000	9.33244	9.27875	9.34242	9.31787	0.034243
	1mM	84	73	75	8400000	7300000	7500000	9.32222	9.26126	9.273	9.28549	0.0323416
	2mM	32	36	30	3200000	3600000	3000000	8.90309	8.95424	8.87506	8.9108	0.0401494
	3mM	61	46	55	61	46	55	4.18327	4.0607	4.1383	4.12742	0.062006
	4mM	<1	<1	<1	<250	<250	<250	<2.4	<2.4	<2.4	<2.4	#DIV/0!
	5mM	<1	<1	<1	<250	<250	<250	<2.4	<2.4	<2.4	<2.4	#DIV/0!
	6mM	<1	<1	<1	<250	<250	<250	<2.4	<2.4	<2.4	<2.4	#DIV/0!
	7mM	<1	<1	<1	<250	<250	<250	<2.4	<2.4	<2.4	<2.4	#DIV/0!
	8mM	<1	<1	<1	<250	<250	<250	<2.4	<2.4	<2.4	<2.4	#DIV/0!
Figure 3C ( M. tuberculosis)
	Indole
	untreated	40	55	65	400000	550000	650000	8	8.1383	8.21085	8.11639	0.107122
	1mM	30	53	35	300000	530000	350000	7.87506	8.12222	7.94201	7.97976	0.127829
	2mM	50	49	37	500000	490000	370000	8.09691	8.08814	7.96614	8.0504	0.073098
	3mM	30	37	44	300000	370000	440000	7.87506	7.96614	8.04139	7.96087	0.0832912
	4mM	200	283	247	200000	283000	247000	7.69897	7.84973	7.79064	7.77978	0.0759626
	5mM	200	171	241	200000	171000	241000	7.69897	7.63094	7.77996	7.70329	0.0746042
	6mM	70	124	63	70000	124000	63000	7.24304	7.49136	7.19728	7.31056	0.158241
	7mM	110	62	84	110000	62000	84000	7.43933	7.19033	7.32222	7.31729	0.124574
	8mM	61	63	73	61000	63000	73000	7.18327	7.19728	7.26126	7.21394	0.0415791
											#DIV/0!	#DIV/0!
	2-Methylindole										#DIV/0!	#DIV/0!
	untreated	40	71	54	400000	710000	540000	8	8.2492	8.13033	8.12651	0.124643
	1mM	30	34	22	300000	340000	220000	7.87506	7.92942	7.74036	7.84828	0.0973317
	2mM	61	45	41	61000	45000	41000	7.18327	7.05115	7.01072	7.08172	0.0902419
	3mM	40	28	49	40000	28000	49000	7	6.8451	7.08814	6.97774	0.123038
	4mM	30	37	24	30000	37000	24000	6.87506	6.96614	6.77815	6.87312	0.0940103
	5mM	148	170	105	14800	17000	10500	6.5682	6.62839	6.41913	6.53857	0.10773
	6mM	138	187	167	138	187	167	4.53782	4.66978	4.62066	4.60942	0.0666951
	7mM	30	23	36	30	23	36	3.87506	3.75967	3.95424	3.86299	0.0978473
	8mM	4	1	7	4	1	7	3	2.39794	3.24304	2.88033	0.435074
											#DIV/0!	#DIV/0!
	5-Methylindole										#DIV/0!	#DIV/0!
	untreated	70	43	53	700000	430000	530000	8.24304	8.03141	8.12222	8.13222	0.106169
	1mM	50	61	45	500000	610000	450000	8.09691	8.18327	8.05115	8.11044	0.0670904
	2mM	19	25	28	190000	250000	280000	7.67669	7.79588	7.8451	7.77256	0.0865909
	3mM	149	124	175	149000	124000	175000	7.57113	7.49136	7.64098	7.56782	0.0748629
	4mM	30	124	17	3000	12400	1700	5.87506	6.49136	5.62839	5.99827	0.444484
	5mM	40	28	68	40	28	68	4	3.8451	4.23045	4.02518	0.193906
	6mM	4	3	2	4	3	2	3	2.87506	2.69897	2.85801	0.151238
	7mM	2	3	1	2	3	1	2.69897	2.87506	2.39794	2.65732	0.241272
	8mM	3	2	1	3	2	1	2.87506	2.69897	2.39794	2.65732	0.241272
											#DIV/0!	#DIV/0!
Figure 3D ( nutrient shift-induced persister)											#DIV/0!	#DIV/0!
	Indole										#DIV/0!	#DIV/0!
											#DIV/0!	#DIV/0!
	untreated	22	28	20	2200000	2800000	2000000	8.74036	8.8451	8.69897	8.76148	0.0753174
	1mM	28	31	27	2800000	3100000	2700000	8.8451	8.8893	8.8293	8.85457	0.0310998
	2mM	7	6	7	700000	600000	700000	8.24304	8.17609	8.24304	8.22072	0.0386517
	3mM	17	15	19	1700000	1500000	1900000	8.62839	8.57403	8.67669	8.62637	0.0513609
	4mM	10	9	9	1000000	900000	900000	8.39794	8.35218	8.35218	8.36744	0.0264181
	5mM	52	63	45	520000	630000	450000	8.11394	8.19728	8.05115	8.12079	0.0733044
	6mM	32	19	37	320000	190000	370000	7.90309	7.67669	7.96614	7.84864	0.152212
	7mM	71	65	75	71000	65000	75000	7.2492	7.21085	7.273	7.24435	0.0313562
	8mM	47	52	40	4700	5200	4000	6.07004	6.11394	6	6.06133	0.057469
											#DIV/0!	#DIV/0!
	2-Methylindole										#DIV/0!	#DIV/0!
	untreated	17	26	19	1700000	2600000	1900000	8.62839	8.81291	8.67669	8.706	0.0956891
	1mM	31	35	27	3100000	3500000	2700000	8.8893	8.94201	8.8293	8.88687	0.0563914
	2mM	80	73	70	800000	730000	700000	8.30103	8.26126	8.24304	8.26844	0.0296553
	3mM	19	17	21	190	170	210	4.67669	4.62839	4.72016	4.67508	0.0459064
	4mM	2	1	1	2	1	1	2.69897	2.39794	2.39794	2.49828	0.1738
	5mM	<1	<1	<1	<250	<250	<250	<2.4	<2.4	<2.4	<2.4	#DIV/0!
											#DIV/0!	#DIV/0!
	5-Methylindole										#DIV/0!	#DIV/0!
	untreated	20	25	31	2000000	2500000	3100000	8.69897	8.79588	8.8893	8.79472	0.0951712
	1mM	16	21	14	1600000	2100000	1400000	8.60206	8.72016	8.54407	8.6221	0.0897391
	2mM	15	24	9	1500000	2400000	900000	8.57403	8.77815	8.35218	8.56812	0.213046
	3mM	25	13	19	250000	130000	190000	7.79588	7.51188	7.67669	7.66149	0.142608
	4mM	17	9	14	170	90	140	4.62839	4.35218	4.54407	4.50821	0.141551
	5mM	<1	<1	<1	<250	<250	<250	<2.4	<2.4	<2.4	<2.4	#DIV/0!
Figure 3E ( starvation-induced persister)											#DIV/0!	#DIV/0!
	Indole										#DIV/0!	#DIV/0!
	untreated	136	142	129	1360000	1420000	1290000	8.53148	8.55023	8.50853	8.53008	0.0208845
	1mM	105	136	115	1050000	1360000	1150000	8.41913	8.53148	8.45864	8.46975	0.056993
	2mM	124	118	138	1240000	1180000	1380000	8.49136	8.46982	8.53782	8.49967	0.0347511
	3mM	129	126	105	1290000	1260000	1050000	8.50853	8.49831	8.41913	8.47532	0.0489328
	4mM	121	115	126	1210000	1150000	1260000	8.48073	8.45864	8.49831	8.47922	0.0198789
	5mM	126	102	118	1260000	1020000	1180000	8.49831	8.40654	8.46982	8.45822	0.0469716
	6mM	58	63	47	580000	630000	470000	8.16137	8.19728	8.07004	8.1429	0.0656018
	7mM	26	15	28	260000	150000	280000	7.81291	7.57403	7.8451	7.74401	0.148087
	8mM	27	36	18	270000	360000	180000	7.8293	7.95424	7.65321	7.81225	0.151238
											#DIV/0!	#DIV/0!
	2-Methylindole										#DIV/0!	#DIV/0!
	untreated	124	135	118	1240000	1350000	1180000	8.49136	8.52827	8.46982	8.49649	0.0295609
	1mM	105	98	113	1050000	980000	1130000	8.41913	8.38917	8.45102	8.41977	0.0309312
	2mM	75	64	82	750000	640000	820000	8.273	8.20412	8.31175	8.26296	0.0545152
	3mM	84	96	82	840000	960000	820000	8.32222	8.38021	8.31175	8.33806	0.0368759
	4mM	63	57	43	630000	570000	430000	8.19728	8.15381	8.03141	8.1275	0.0860098
	5mM	96	103	86	96000	103000	86000	7.38021	7.41078	7.33244	7.37448	0.0394831
	6mM	102	84	96	1020	840	960	5.40654	5.32222	5.38021	5.36966	0.0431399
	7mM	63	57	76	63	57	76	4.19728	4.15381	4.27875	4.20995	0.0634256
	8mM	#VALUE!	#VALUE!	#VALUE!	#VALUE!	#VALUE!	#VALUE!	#VALUE!	#VALUE!	#VALUE!	#VALUE!	#VALUE!
											#DIV/0!	#DIV/0!
	5-Methylindole										#DIV/0!	#DIV/0!
	untreated	124	136	121	1240000	1360000	1210000	8.49136	8.53148	8.48073	8.50119	0.0267658
	1mM	66	73	86	660000	730000	860000	8.21748	8.26126	8.33244	8.2704	0.0580188
	2mM	84	78	90	840000	780000	900000	8.32222	8.29003	8.35218	8.32148	0.0310806
	3mM	75	63	59	750000	630000	590000	8.273	8.19728	8.16879	8.21302	0.0538591
	4mM	46	55	62	46000	55000	62000	7.0607	7.1383	7.19033	7.12978	0.0652361
	5mM	53	37	46	530	370	460	5.12222	4.96614	5.0607	5.04969	0.0786177
	6mM	<1	<1	<1	<250	<250	<250	<2.4	<2.4	<2.4	<2.4	#DIV/0!
	7mM	<1	<1	<1	<250	<250	<250	<2.4	<2.4	<2.4	<2.4	#DIV/0!
	8mM	<1	<1	<1	<250	<250	<250	<2.4	<2.4	<2.4	<2.4	#DIV/0!
											#DIV/0!	#DIV/0!
Figure 4A ( Treament time)	0.5h										#DIV/0!	#DIV/0!
	Untreated	196	187	183	19600000	18700000	18300000	9.6902	9.66978	9.66039	9.67346	0.0152385		9.67346	0.01524	9.67346	0.01524	9.67965	0.01022	9.6435	0.04548
	Tob	187	196	179	18700000	19600000	17900000	9.66978	9.6902	9.65079	9.67026	0.0197058		9.67026	0.01971	8.50328	0.03116	8.58683	0.02567	8.37539	0.20384
	Tob+I	129	118	136	1290000	1180000	1360000	8.50853	8.46982	8.53148	8.50328	0.0311623		9.53132	0.03988	7.99155	0.14645	7.07767	0.11977	6.2528	0.02435
	Tob+2-I	156	145	163	1560000	1450000	1630000	8.59106	8.55931	8.61013	8.58683	0.0256727		9.35339	0.23865	6.10471	0.06916	4.15288	0.12957	2.4	0
	Tob+5-I	163	75	70	1630000	750000	700000	8.61013	8.273	8.24304	8.37539	0.203841		8.93142	0.09284	2.4	0	2.4	0	2.4	0
											#DIV/0!	#DIV/0!
	1h										#DIV/0!	#DIV/0!
	Untreated	187	196	183	18700000	19600000	18300000	9.66978	9.6902	9.66039	9.67346	0.0152385
	Tob	136	149	124	13600000	14900000	12400000	9.53148	9.57113	9.49136	9.53132	0.0398825
	Tob+I	52	43	27	520000	430000	270000	8.11394	8.03141	7.8293	7.99155	0.146446
	Tob+2-I	53	35	59	53000	35000	59000	7.12222	6.94201	7.16879	7.07767	0.119774
	Tob+5-I	76	71	68	7600	7100	6800	6.27875	6.2492	6.23045	6.2528	0.0243529
											#DIV/0!	#DIV/0!
	2h										#DIV/0!	#DIV/0!
	Untreated	196	187	191	19600000	18700000	19100000	9.6902	9.66978	9.67897	9.67965	0.0102241
	Tob	163	82	55	16300000	8200000	5500000	9.61013	9.31175	9.1383	9.35339	0.238653
	Tob+I	52	43	59	5200	4300	5900	6.11394	6.03141	6.16879	6.10471	0.0691552
	Tob+2-I	80	46	50	80	46	50	4.30103	4.0607	4.09691	4.15288	0.129574
	Tob+5-I	<1	<1	<1	<250	<250	<250	<2.4	<2.4	<2.4	<2.4	#DIV/0!
											#DIV/0!	#DIV/0!
	3h										#DIV/0!	#DIV/0!
	Untreated	159	196	175	15900000	19600000	17500000	9.59934	9.6902	9.64098	9.6435	0.0454821
	Tob	41	27	36	4100000	2700000	3600000	9.01072	8.8293	8.95424	8.93142	0.0928377
	Tob+I	<1	<1	<1	<250	<250	<250	<2.4	<2.4	<2.4	<2.4	#DIV/0!
	Tob+2-I	<1	<1	<1	<250	<250	<250	<2.4	<2.4	<2.4	<2.4	#DIV/0!
	Tob+5-I	<1	<1	<1	<250	<250	<250	<2.4	<2.4	<2.4	<2.4	#DIV/0!
Figure 4B ( Adjuvant Concentration)	concentration of adjuvant
	Indole
	Tob	76	94	88	760000	940000	880000	8.27875	8.37107	8.34242	8.33075	0.0472515		9.67346	0.01524	7.28868	0.0639174	6.51277	0.0169865	7.02427	0.0964355
	0.5mM	92	73	70	92000	73000	70000	7.36173	7.26126	7.24304	7.28868	0.0639174		9.67346	0.01524	7.25965	0.0685278	6.0021	0.0439922	6.30712	0.0378392
	1mM	73	62	85	73000	62000	85000	7.26126	7.19033	7.32736	7.25965	0.0685278		9.67346	0.01524	5.45218	0.0427779	5.20304	0.135313	4.94609	0.146299
	2mM	124	115	102	1240	1150	1020	5.49136	5.45864	5.40654	5.45218	0.0427779		9.67346	0.01524	2.4	0	2.4	0	2.4	0
	4mM	<1	<1	<1	<250	<250	<250	<2.4	<2.4	<2.4	<2.4	#DIV/0!
											#DIV/0!	#DIV/0!
	2-Indole										#DIV/0!	#DIV/0!
	Tob	90	62	73	900000	620000	730000	8.35218	8.19033	8.26126	8.26793	0.0811309
	0.5mM	126	129	136	12600	12900	13600	6.49831	6.50853	6.53148	6.51277	0.0169865
	1mM	37	45	39	3700	4500	3900	5.96614	6.05115	5.989	6.0021	0.0439922
	2mM	90	49	59	900	490	590	5.35218	5.08814	5.16879	5.20304	0.135313
	4mM	<1	<1	<1	<250	<250	<250	<2.4	<2.4	<2.4	<2.4	#DIV/0!
											#DIV/0!	#DIV/0!
	5-Indole										#DIV/0!	#DIV/0!
	Tob	75	86	90	750000	860000	900000	8.273	8.33244	8.35218	8.31921	0.0412154
	0.5mM	34	42	53	34000	42000	53000	6.92942	7.02119	7.12222	7.02427	0.0964355
	1mM	82	88	74	8200	8800	7400	6.31175	6.34242	6.26717	6.30712	0.0378392
	2mM	25	36	49	250	360	490	4.79588	4.95424	5.08814	4.94609	0.146299
	4mM	<1	<1	<1	<250	<250	<250	<2.4	<2.4	<2.4	<2.4	#DIV/0!
											#DIV/0!	#DIV/0!
Figure 4C ( Tob concentration)	concentration of Tob
	50ug/ml
	Untreated	179	187	196	17900000	18700000	19600000	9.65079	9.66978	9.6902	9.67026	0.0197058		0	9.67026	0.01971	9.66652	0.01437	9.66011	0.019	9.66386
	Tob	135	145	121	13500000	14500000	12100000	9.52827	9.55931	9.48073	9.52277	0.0395795		50	9.52277	0.03958	8.2913	0.05662	7.38735	0.0208	7.12803
	Tob+I	88	68	80	880000	680000	800000	8.34242	8.23045	8.30103	8.2913	0.0566174		100	9.26488	0.05514	7.35154	0.029	6.09691	0.06165	4.85165
	Tob+2-I	94	96	103	94000	96000	103000	7.37107	7.38021	7.41078	7.38735	0.0207955		250	8.31098	0.03184	2.4	0	2.4	0	2.4
	Tob+5-I	54	70	41	54000	70000	41000	7.13033	7.24304	7.01072	7.12803	0.116174		500	7.13356	0.05203	2.4	0	2.4	0	2.4
	100ug/ml
	Untreated	191	179	187	19100000	17900000	18700000	9.67897	9.65079	9.66978	9.66652	0.0143712
	Tob	76	64	82	7600000	6400000	8200000	9.27875	9.20412	9.31175	9.26488	0.0551426
	Tob+I	84	90	96	84000	90000	96000	7.32222	7.35218	7.38021	7.35154	0.0290014
	Tob+2-I	57	51	43	5700	5100	4300	6.15381	6.10551	6.03141	6.09691	0.0616546
	Tob+5-I	24	33	29	240	330	290	4.77815	4.91645	4.86034	4.85165	0.0695597
	250ug/ml
	Untreated	183	175	191	18300000	17500000	19100000	9.66039	9.64098	9.67897	9.66011	0.0189992
	Tob	88	76	82	880000	760000	820000	8.34242	8.27875	8.31175	8.31098	0.0318417
	Tob+I	<1	<1	<1	<250	<250	<250	<2.4	<2.4	<2.4	<2.4	#DIV/0!
	Tob+2-I	<1	<1	<1	<250	<250	<250	<2.4	<2.4	<2.4	<2.4	#DIV/0!
	Tob+5-I	<1	<1	<1	<250	<250	<250	<2.4	<2.4	<2.4	<2.4	#DIV/0!
	500ug/ml
	Untreated	175	196	183	17500000	19600000	18300000	9.64098	9.6902	9.66039	9.66386	0.0247912
	Tob	49	53	62	49000	53000	62000	7.08814	7.12222	7.19033	7.13356	0.0520339
	Tob+I	<1	<1	<1	<250	<250	<250	<2.4	<2.4	<2.4	<2.4	#DIV/0!
	Tob+2-I	<1	<1	<1	<250	<250	<250	<2.4	<2.4	<2.4	<2.4	#DIV/0!
	Tob+5-I	<1	<1	<1	<250	<250	<250	<2.4	<2.4	<2.4	<2.4	#DIV/0!
Figure 5B ( Treament time-3h)
	3h
	50ug/ml
	Untreated	187	191	179	18700000	19100000	17900000	9.66978	9.67897	9.65079	9.66652	0.0143712		9.66652	0.0143712	9.64708	0.0247725	9.64708	0.0247725	9.66621	0.0246326
	Tob	87	73	76	8700000	7300000	7600000	9.33746	9.26126	9.27875	9.29249	0.0399128		9.29249	0.0399128	8.23299	0.207512	8.22604	0.155006	8.82134	0.058107
	Tob+I	10	80	40	1000000	800000	400000	8.39794	8.30103	8	8.23299	0.207512		9.10954	0.0760264	7.93424	0.101276	7.85147	0.137545	8.71111	0.143539
	Tob+2-I	61	10	5	610000	1000000	500000	8.18327	8.39794	8.09691	8.22604	0.155006		8.7471	0.056135	4.11332	0.122347	5.75522	0.0764022	7.5919	0.0974069
	Tob+5-I	30	27	23	3000000	2700000	2300000	8.87506	8.8293	8.75967	8.82134	0.058107		8.02752	0.0714132	2.4	0	2.4	0	4.87903	0.0852001
											#DIV/0!	#DIV/0!
	100ug/ml										#DIV/0!	#DIV/0!
	Untreated	179	187	167	17900000	18700000	16700000	9.65079	9.66978	9.62066	9.64708	0.0247725
	Tob	61	52	43	6100000	5200000	4300000	9.18327	9.11394	9.03141	9.10954	0.0760264
	Tob+I	35	27	43	350000	270000	430000	7.94201	7.8293	8.03141	7.93424	0.101276
	Tob+2-I	31	20	37	310000	200000	370000	7.8893	7.69897	7.96614	7.85147	0.137545
	Tob+5-I	20	15	29	2000000	1500000	2900000	8.69897	8.57403	8.86034	8.71111	0.143539
											#DIV/0!	#DIV/0!
	250ug/ml										#DIV/0!	#DIV/0!
	Untreated	175	187	167	17500000	18700000	16700000	9.64098	9.66978	9.62066	9.64381	0.0246843
	Tob	23	194	25	2300000	1940000	2500000	8.75967	8.68574	8.79588	8.7471	0.056135
	Tob+I	7	5	4	70	50	40	4.24304	4.09691	4	4.11332	0.122347
	Tob+2-I	19	23	27	1900	2300	2700	5.67669	5.75967	5.8293	5.75522	0.0764022
	Tob+5-I	129	148	200	129000	148000	200000	7.50853	7.5682	7.69897	7.5919	0.0974069
											#DIV/0!	#DIV/0!
	500ug/ml										#DIV/0!	#DIV/0!
	Untreated	186	196	175	18600000	19600000	17500000	9.66745	9.6902	9.64098	9.66621	0.0246326
	Tob	50	43	36	500000	430000	360000	8.09691	8.03141	7.95424	8.02752	0.0714132
	Tob+I	<1	<1	<1	<250	<250	<250	<2.4	<2.4	<2.4	<2.4	#DIV/0!
	Tob+2-I	<1	<1	<1	<250	<250	<250	<2.4	<2.4	<2.4	<2.4	#DIV/0!
	Tob+5-I	30	25	37	300	250	370	4.87506	4.79588	4.96614	4.87903	0.0852001
											#DIV/0!	#DIV/0!
Figure 5C ( Treament time-5h)	5h										#DIV/0!	#DIV/0!
	50ug/ml										#DIV/0!	#DIV/0!
	Untreated	183	179	191	18300000	17900000	19100000	9.66039	9.65079	9.67897	9.66339	0.0143269		9.66339	0.0143269	9.65477	0.0329754	9.66051	0.0296302	9.66054	0.042867
	Tob	71	63	80	7100000	6300000	8000000	9.2492	9.19728	9.30103	9.24917	0.0518747		9.24917	0.0518747	7.94274	0.100613	7.65403	0.0954375	8.55813	0.213332
	Tob+I	38	42	27	380000	420000	270000	7.97772	8.02119	7.8293	7.94274	0.100613		8.93536	0.119259	6.48596	0.0302792	6.32464	0.0598567	7.56035	0.0350427
	Tob+2-I	17	15	23	170000	150000	230000	7.62839	7.57403	7.75967	7.65403	0.0954375		8.25087	0.0560755	2.4	0	2.4	0	5.59272	0.111219
	Tob+5-I	14	9	24	1400000	900000	2400000	8.54407	8.35218	8.77815	8.55813	0.213332		6.50866	0.0360157	2.4	0	2.4	0	2.4	0
											#DIV/0!	#DIV/0!
	100ug/ml										#DIV/0!	#DIV/0!
	Untreated	175	197	171	17500000	19700000	17100000	9.64098	9.69241	9.63094	9.65477	0.0329754
	Tob	35	45	26	3500000	4500000	2600000	8.94201	9.05115	8.81291	8.93536	0.119259
	Tob+I	132	115	121	13200	11500	12100	6.51851	6.45864	6.48073	6.48596	0.0302792
	Tob+2-I	96	86	73	9600	8600	7300	6.38021	6.33244	6.26126	6.32464	0.0598567
	Tob+5-I	159	142	136	159000	142000	136000	7.59934	7.55023	7.53148	7.56035	0.0350427
											#DIV/0!	#DIV/0!
	250ug/ml										#DIV/0!	#DIV/0!
	Untreated	196	183	171	19600000	18300000	17100000	9.6902	9.66039	9.63094	9.66051	0.0296302
	Tob	80	73	62	800000	730000	620000	8.30103	8.26126	8.19033	8.25087	0.0560755
	Tob+I	<1	<1	<1	<250	<250	<250	<2.4	<2.4	<2.4	<2.4	#DIV/0!
	Tob+2-I	<1	<1	<1	<250	<250	<250	<2.4	<2.4	<2.4	<2.4	#DIV/0!
	Tob+5-I	16	12	20	1600	1200	2000	5.60206	5.47712	5.69897	5.59272	0.111219
											#DIV/0!	#DIV/0!
	500ug/ml										#DIV/0!	#DIV/0!
	Untreated	175	171	205	17500000	17100000	20500000	9.64098	9.63094	9.70969	9.66054	0.042867
	Tob	131	118	139	13100	11800	13900	6.51521	6.46982	6.54095	6.50866	0.0360157
	Tob+I	<1	<1	<1	<250	<250	<250	<2.4	<2.4	<2.4	<2.4	#DIV/0!
	Tob+2-I	<1	<1	<1	<250	<250	<250	<2.4	<2.4	<2.4	<2.4	#DIV/0!
	Tob+5-I	<1	<1	<1	<250	<250	<250	<2.4	<2.4	<2.4	<2.4	#DIV/0!
Figure 5A ( Treament time-5h)						average	stdev
	A454	H2O	0.682	0.678	0.73	0.696667	0.0289367
		DMSO	0.002	0	0.005	0.00233333	0.00251661		ratio
	Indole	1	0.033	0.025	0.044	0.034	0.00953939		0.0456312
		2	0.029	0.027	0.119	0.0583333	0.0525484		0.0806583
		3	0.03	0.032	0.041	0.0343333	0.00585947		0.046111
		4	0.028	0.026	0.036	0.03	0.0052915		0.0398733
	2-Methylindole	1	0.003	0.004	0.009	0.00533333	0.00321455		0.00436639
		2	0.05	0.047	0.05	0.049	0.00173205		0.0672233
		3	0.042	0.036	0.068	0.0486667	0.0170098		0.0667434
		4	0.044	0.056	0.066	0.0553333	0.0110151		0.0763399
	5-Methylindole	1	0.014	0.015	0.035	0.0213333	0.0118462		0.0273979
		2	0.051	0.058	0.076	0.0616667	0.012897		0.0854566
		3	0.101	0.11	0.118	0.109667	0.0085049		0.154551
		4	0.166	0.178	0.18	0.174667	0.00757188		0.248117
